# Supplementary material for: The Use of an Organo-Selenium Peptide to Develop New Antimicrobials That Target a Specific Bacteria
Source: MDPI journal article supplement (doi:10.3390/antibiotics10060611), 2021-05-21
Supplement: s1 [file s1]

The following supplements refer to Table 1 in the manuscript.

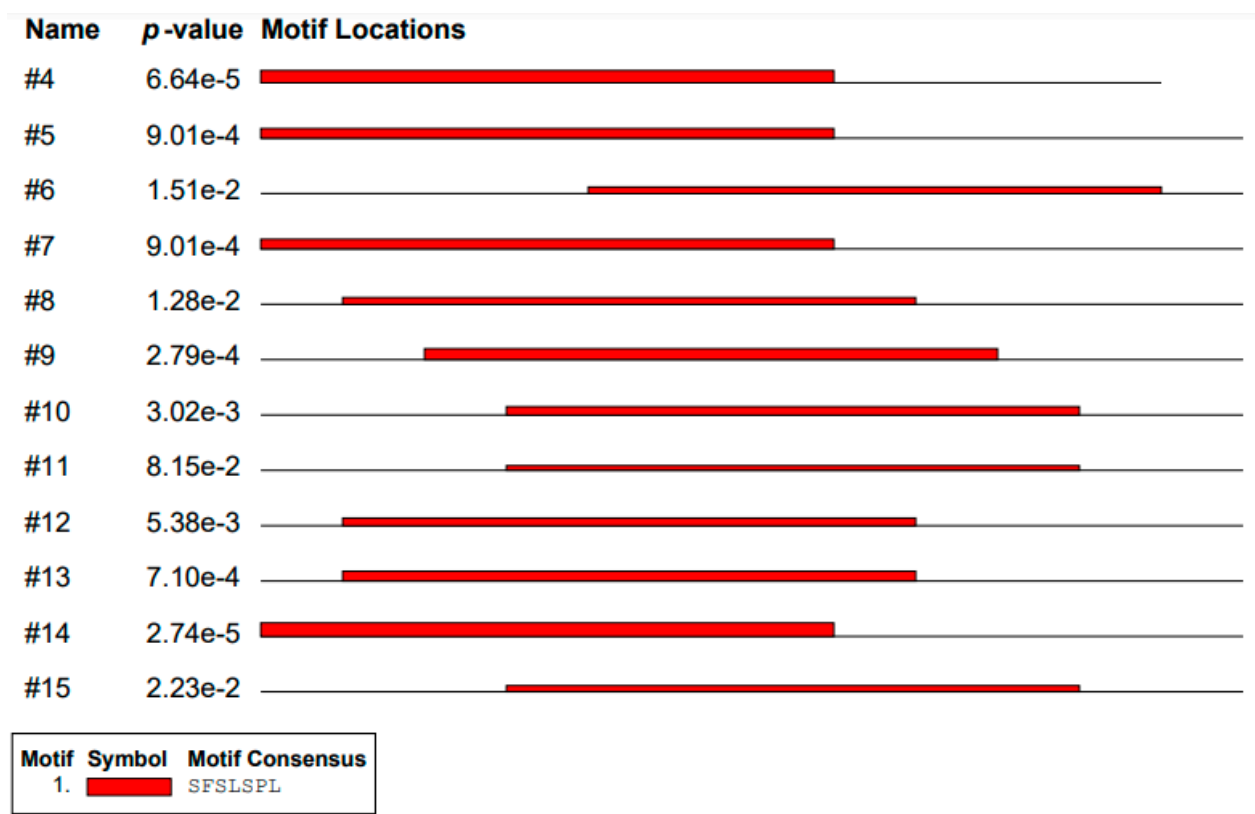

**Figure S1.** Sequence Motif Consensus Sequence Analysis from Peptide Sequences using MEME (<https://meme-suite.org/meme/tools/meme>). The thickness of the bar corresponds to probability of sequence overlap. And the length corresponds to the location.

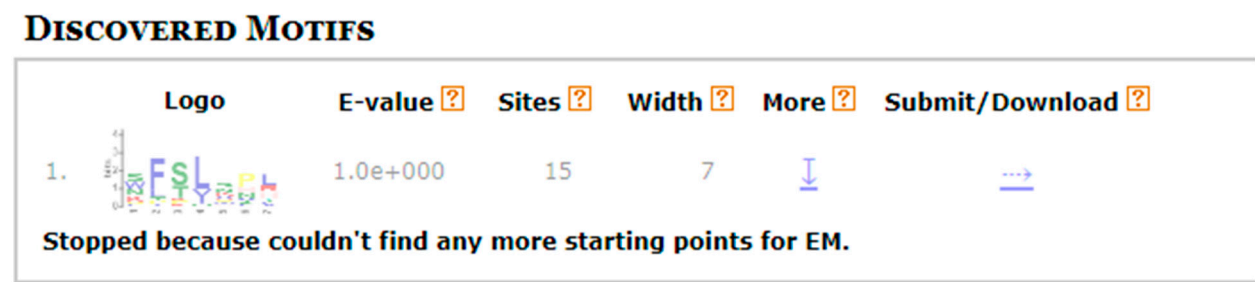

**Figure S2.** Discovered Motifs from Peptide Sequences using MEME (<https://meme-suite.org/meme/tools/meme>). See Motif consensus sequence above in Supplemental Figure 1.

| Role              | Source <sup>?</sup> | Alphabet <sup>?</sup> | Sequence Count <sup>?</sup> | Total Size <sup>?</sup> |
|-------------------|---------------------|-----------------------|-----------------------------|-------------------------|
| Primary Sequences | sequences.fa        | Protein               | 15                          | 177                     |

---

**Background Model**

Source: built from the (primary) sequences

Order: 0

|   | Name <sup>?</sup> | Freq. <sup>?</sup> | Bg. <sup>?</sup> |
|---|-------------------|--------------------|------------------|
| A | Alanine           | 0.0395             | 0.0395           |
| C | Cysteine          | 0                  | 0.0000282        |
| D | Aspartic acid     | 0                  | 0.0000282        |
| E | Glutamic acid     | 0.00565            | 0.00567          |
| F | Phenylalanine     | 0.113              | 0.113            |
| G | Glycine           | 0.0169             | 0.017            |
| H | Histidine         | 0.0565             | 0.0565           |
| I | Isoleucine        | 0.0226             | 0.0226           |
| K | Lysine            | 0.0452             | 0.0452           |
| L | Leucine           | 0.141              | 0.141            |
| M | Methionine        | 0.0339             | 0.0339           |
| N | Asparagine        | 0.0565             | 0.0565           |
| P | Proline           | 0.096              | 0.096            |
| Q | Glutamine         | 0.0226             | 0.0226           |
| R | Arginine          | 0.0508             | 0.0508           |
| S | Serine            | 0.175              | 0.175            |
| T | Threonine         | 0.0508             | 0.0508           |
| V | Valine            | 0.0169             | 0.017            |
| W | Tryptophan        | 0.0508             | 0.0508           |
| Y | Tyrosine          | 0.00565            | 0.00567          |

Figure S3. Frequency of Amino Acids from Peptide Sequences using MEME (<https://meme-suite.org/meme/tools/meme>).

### Other Settings

|                                 |                                      |
|---------------------------------|--------------------------------------|
| <b>Motif Site Distribution</b>  | ZOOPS: Zero or one site per sequence |
| <b>Objective Function</b>       | E-value of product of p-values       |
| <b>Starting Point Function</b>  | E-value of product of p-values       |
| <b>Site Strand Handling</b>     | This alphabet only has one strand    |
| <b>Maximum Number of Motifs</b> | 3                                    |
| <b>Motif E-value Threshold</b>  | no limit                             |
| <b>Minimum Motif Width</b>      | 6                                    |
| <b>Maximum Motif Width</b>      | 12                                   |
| <b>Minimum Sites per Motif</b>  | 2                                    |
| <b>Maximum Sites per Motif</b>  | 15                                   |

[Show Advanced Settings](#)

Figure S4. Settings Used for Analysis of Peptides Using MEME (<https://meme-suite.org/meme/tools/meme>).
